# Supplementary material
Source: PubMed Central journal article supplement (PMC1458946)
Supplement: pnas_0600345103_1.pdf [file pnas_0600345103_1.pdf]

**A.**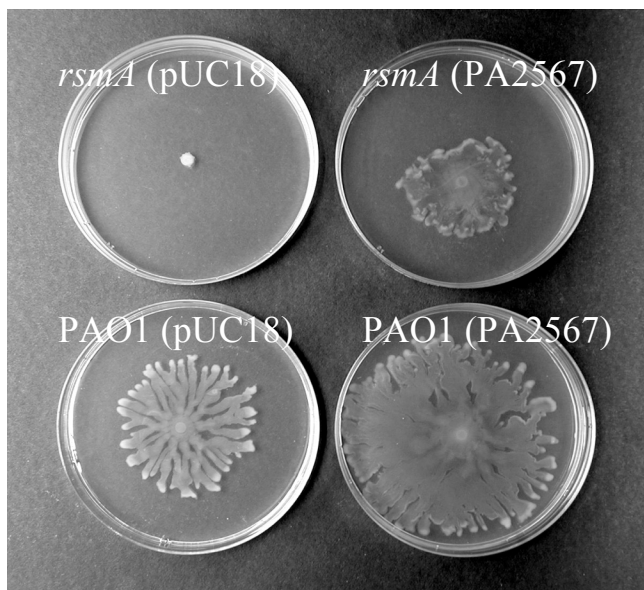**B.**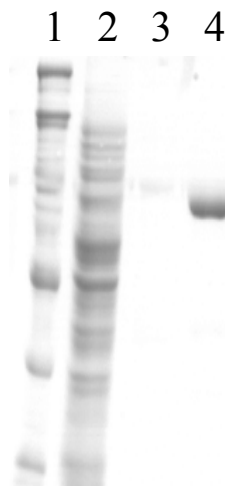**C.**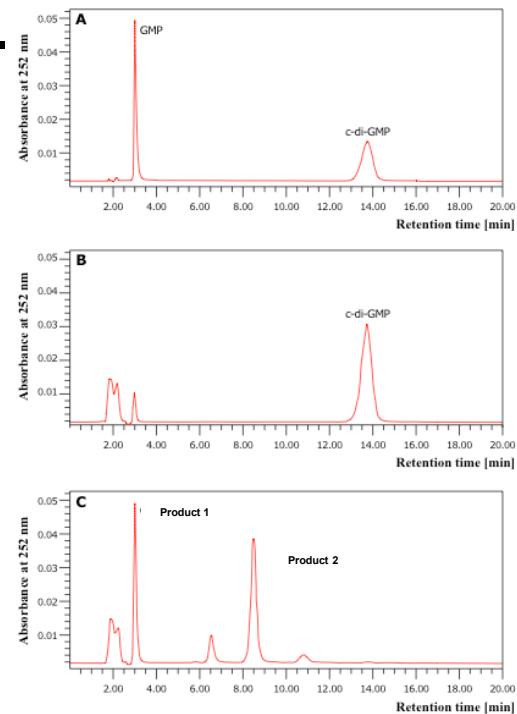**D.**

Effect of introduction of PA2567 on mannanase activity in strains of *X. campestris*

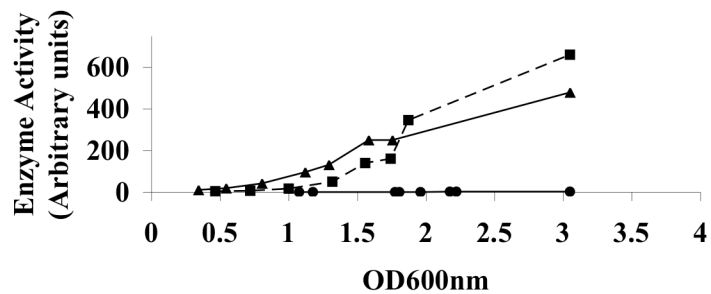

--■-- 8004 (pME6032)    ● rpfG (pME6032)    ▲ rpfG (PA2567)

**E.**

Effect of introduction of PA2567 on endoglucanase activity in strains of *X. campestris*

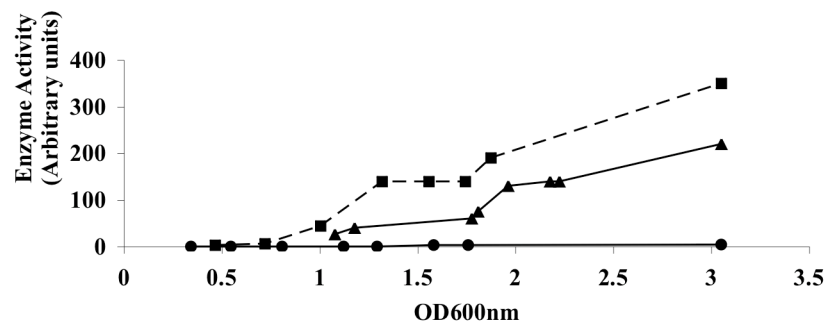

--■-- 8004 (pME6032)    ▲ rpfG (PA2567)    ● rpfG (pME6032)
