# Supplementary material
Source: PubMed Central journal article supplement (PMC1458946)

**A.**Effect of introduction of *pvrR* on mannanase activity in strains of *X. campestris*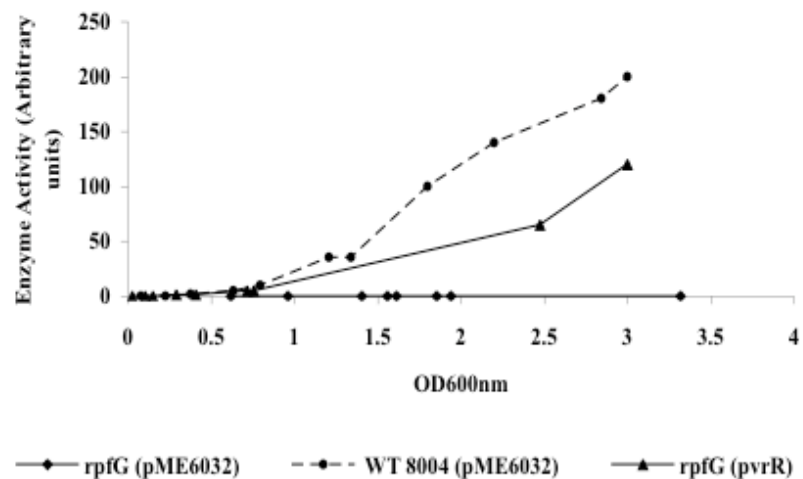**B.**Effect of introduction of *pvrR* on endoglucanase activity in *X. campestris*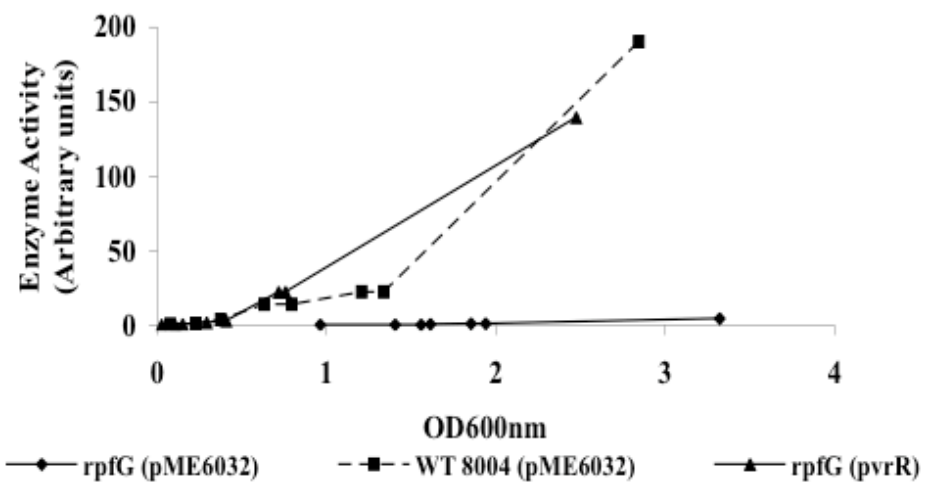**C.**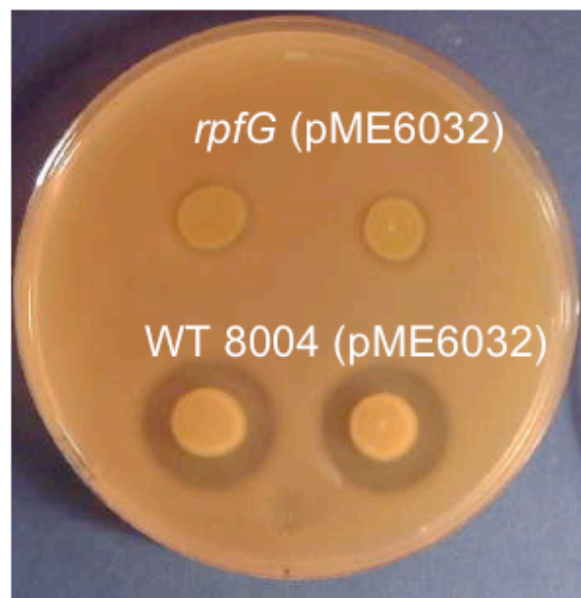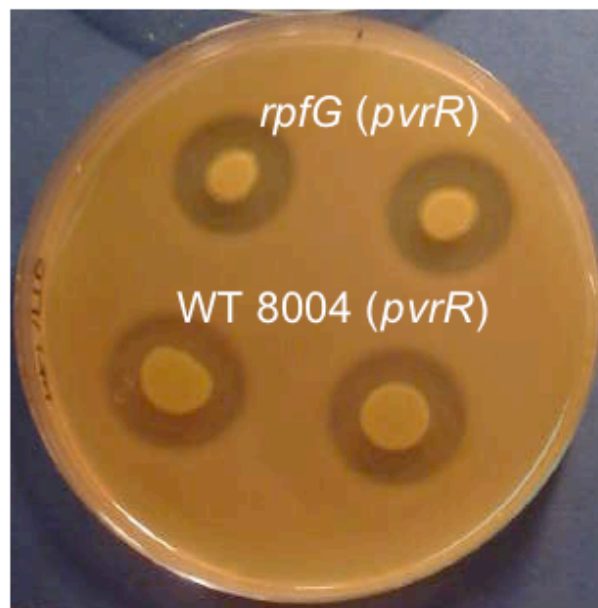

Supplement: pnas_0600345103_2.pdf [file pnas_0600345103_2.pdf]
