# Supplementary material
Source: PubMed Central journal article supplement (PMC1458946)

**Effect of the introduction of *wspR19* on endo-mannanase activity**

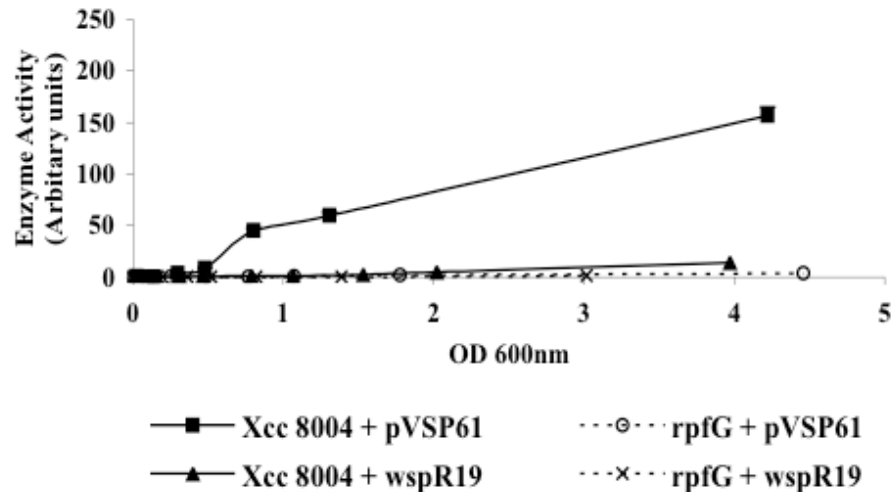

**B. Effect of the introduction of *wspR19* on endo-glucanase activity**

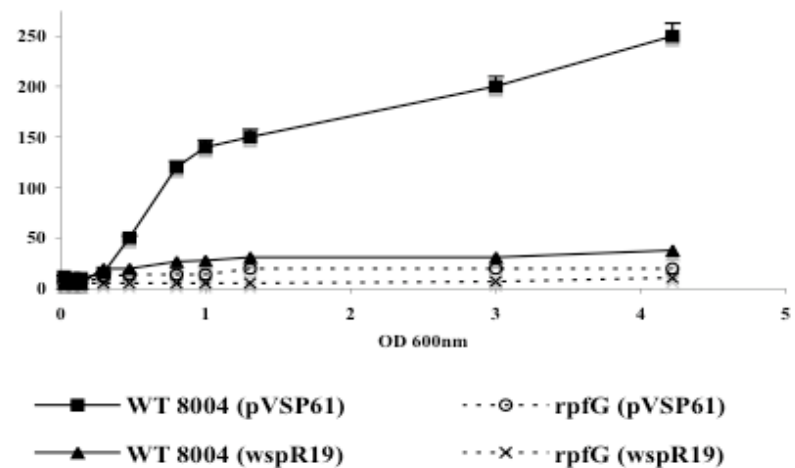

**C.**

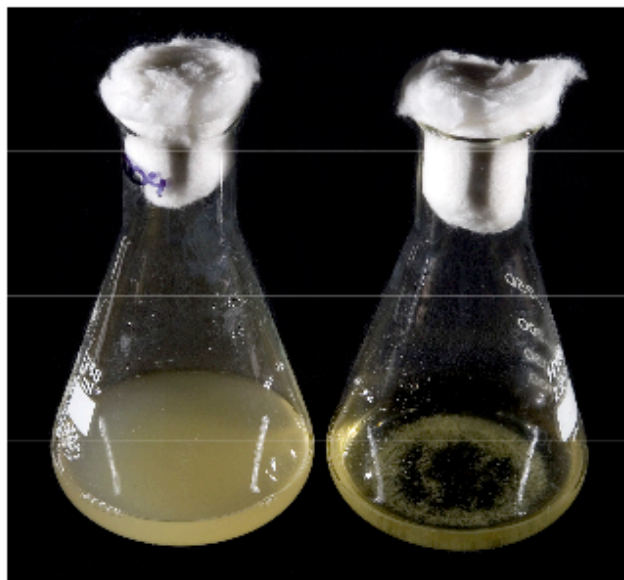

**D.**

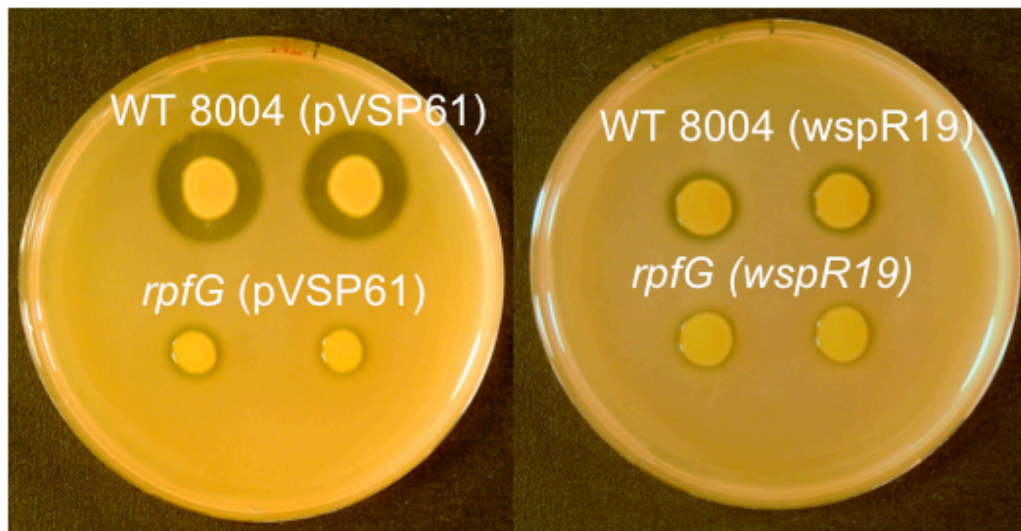

Supplement: pnas_0600345103_3.pdf [file pnas_0600345103_3.pdf]
