# Supplementary material
Source: PubMed Central journal article supplement (PMC1458946)

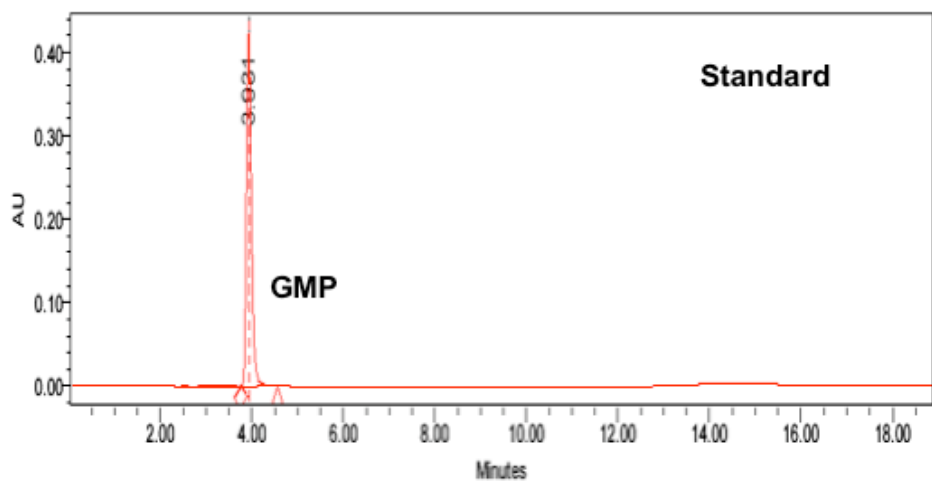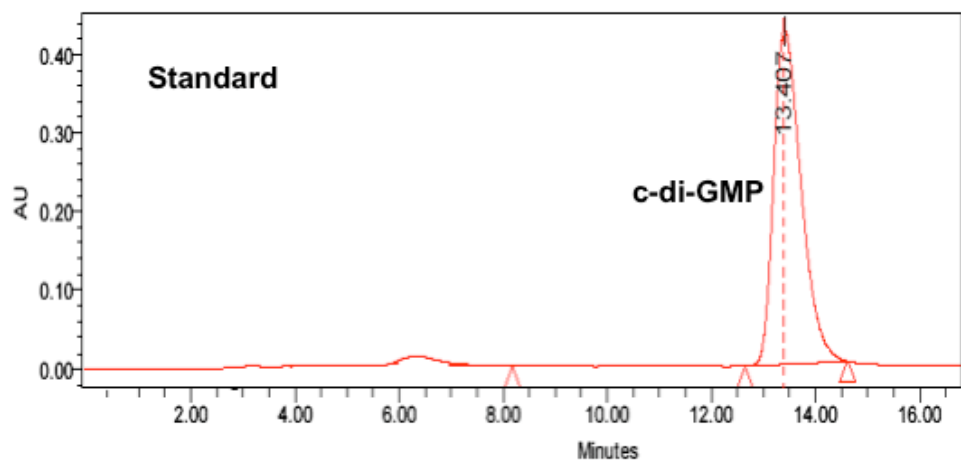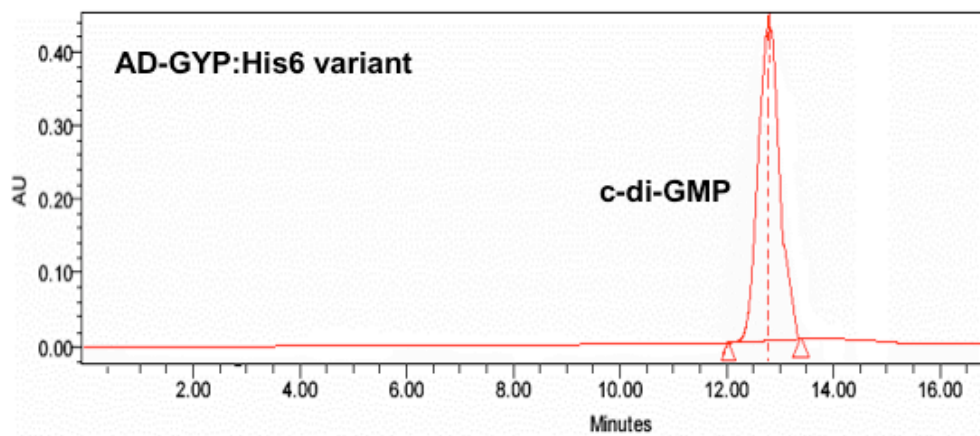

Supplement: pnas_0600345103_4.pdf [file pnas_0600345103_4.pdf]

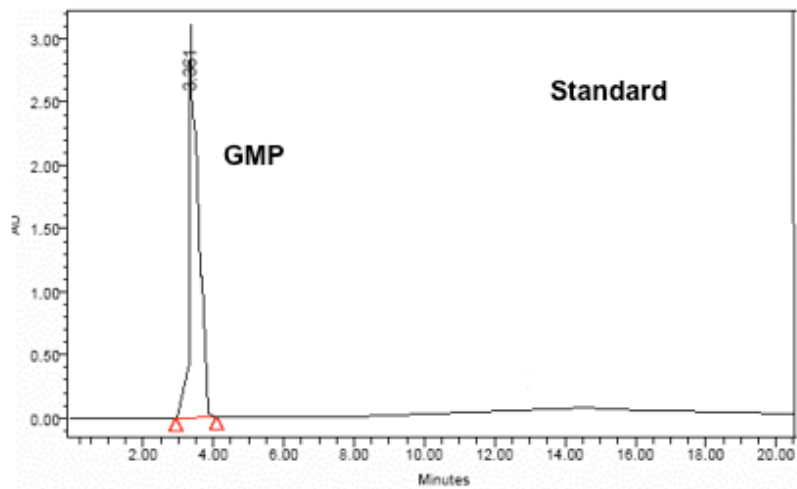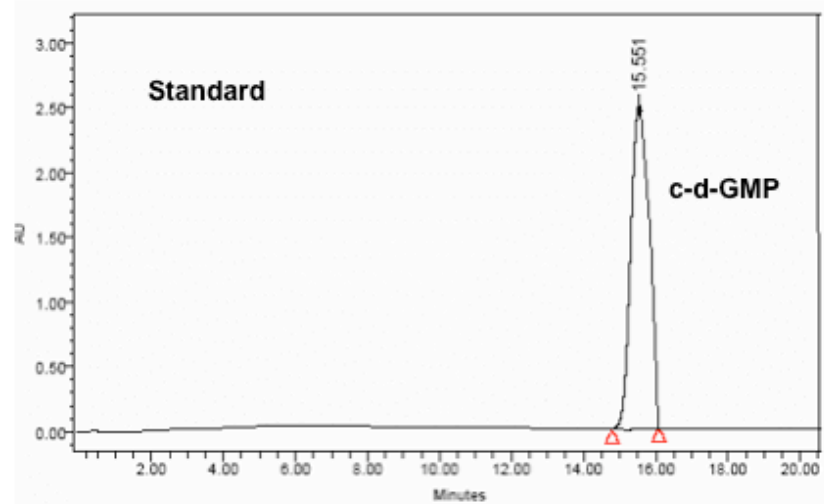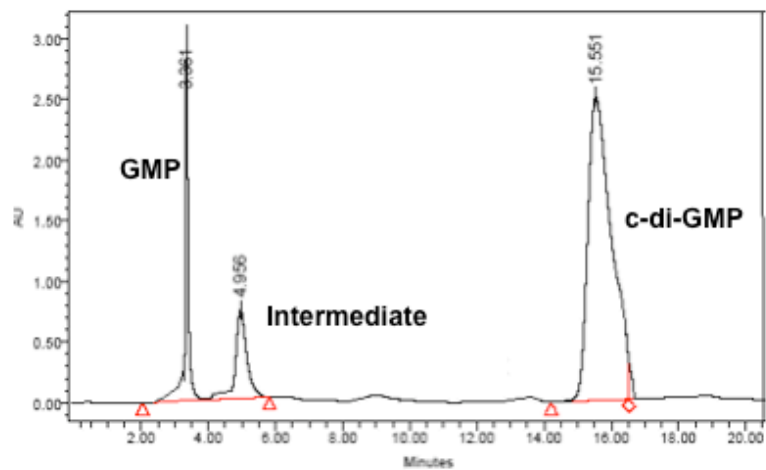

Supplement: pnas_0600345103_5.pdf [file pnas_0600345103_5.pdf]

# Cell-cell signalling in *Xanthomonas campestris*

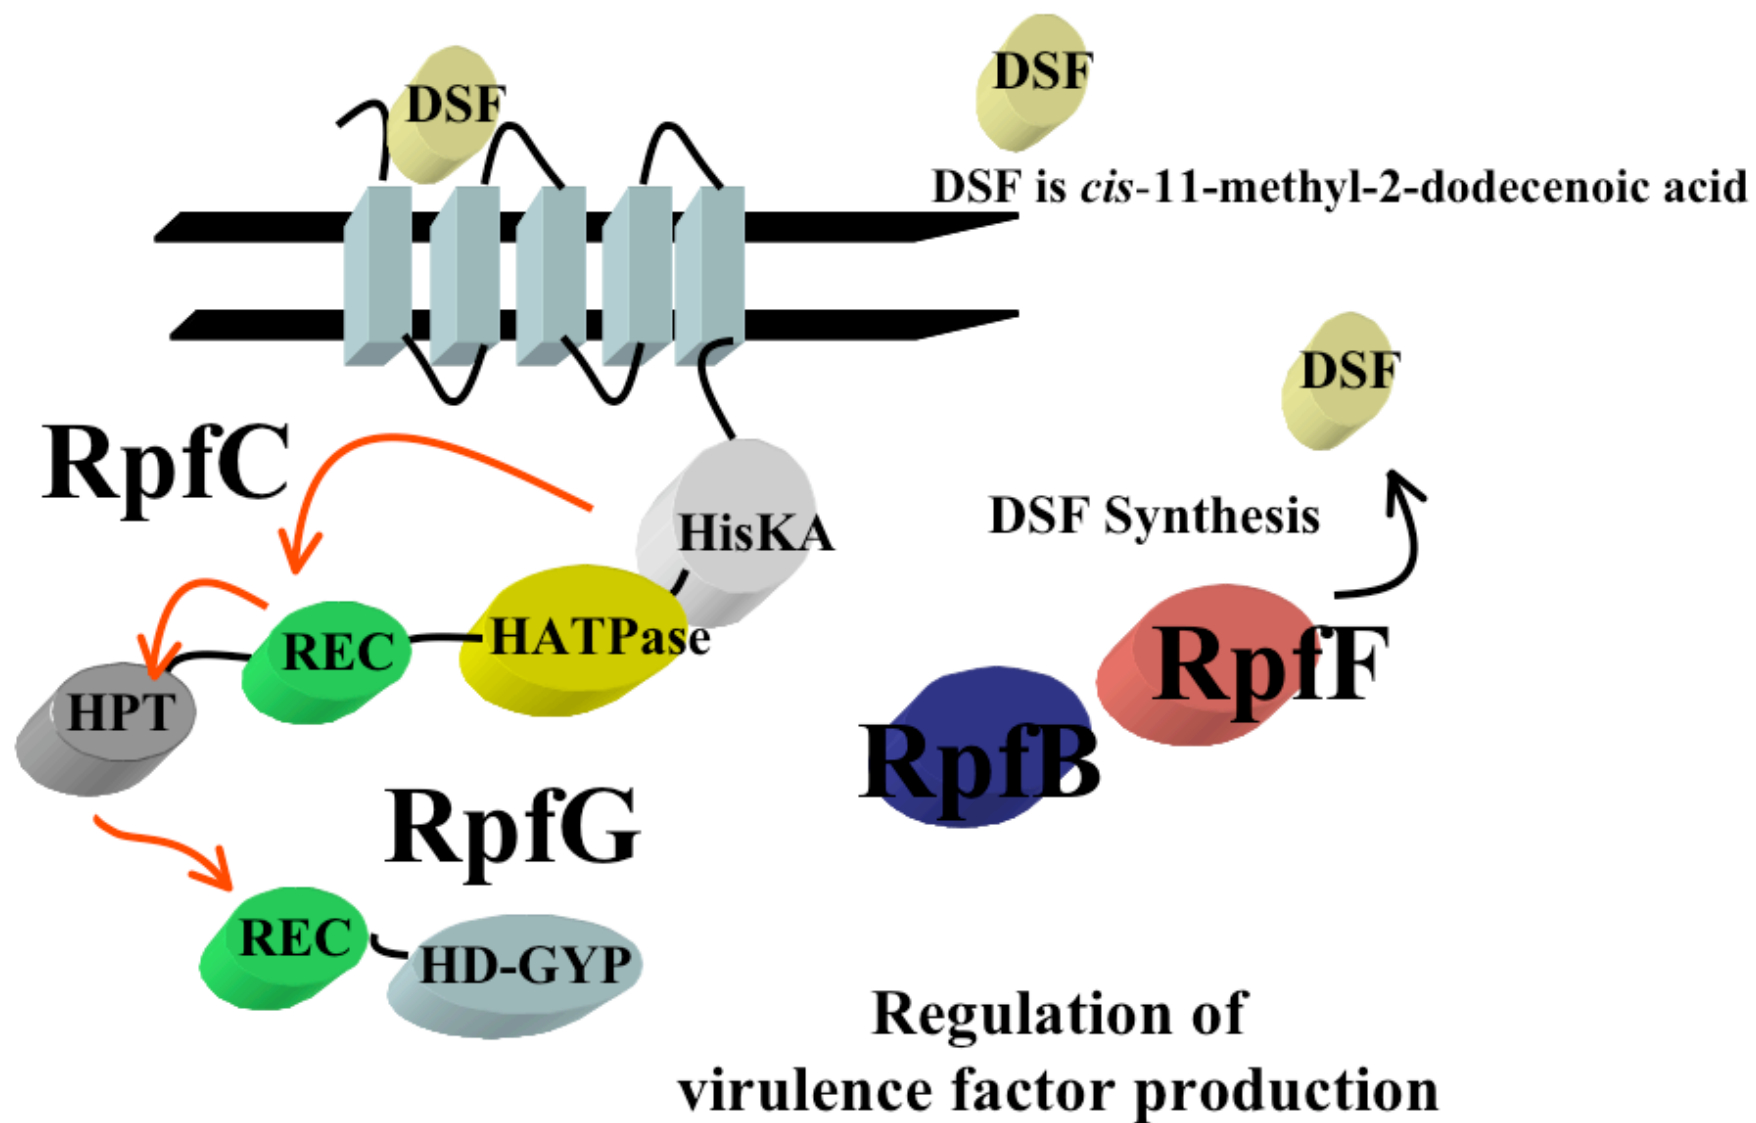

Supplement: pnas_0600345103_6.pdf [file pnas_0600345103_6.pdf]
